# Supplementary material for: Atmospheric speciated mercury concentrations on an island between China and Korea: sources and transport pathways
Source: Copernicus journal article supplement (doi:10.5194/acp-16-4119-2016), 2016-03-30
Supplement: Supplementary file 1 [file acp-16-4119-2016-supplement.pdf]

Supplement of Atmos. Chem. Phys., 16, 4119–4133, 2016  
<http://www.atmos-chem-phys.net/16/4119/2016/>  
doi:10.5194/acp-16-4119-2016-supplement  
© Author(s) 2016. CC Attribution 3.0 License.

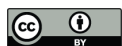

Atmospheric  
Chemistry  
and Physics  
Open Access  
EGU

*Supplement of*

## **Atmospheric speciated mercury concentrations on an island between China and Korea: sources and transport pathways**

**Gang-San Lee et al.**

*Correspondence to:* Young-Ji Han (youngji@kangwon.ac.kr)

The copyright of individual parts of the supplement might differ from the CC-BY 3.0 licence.

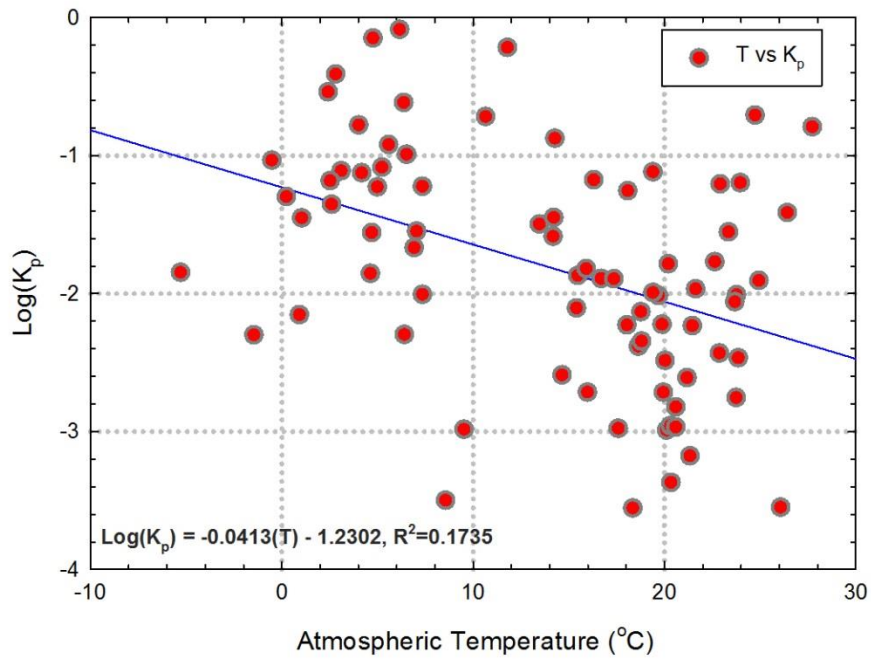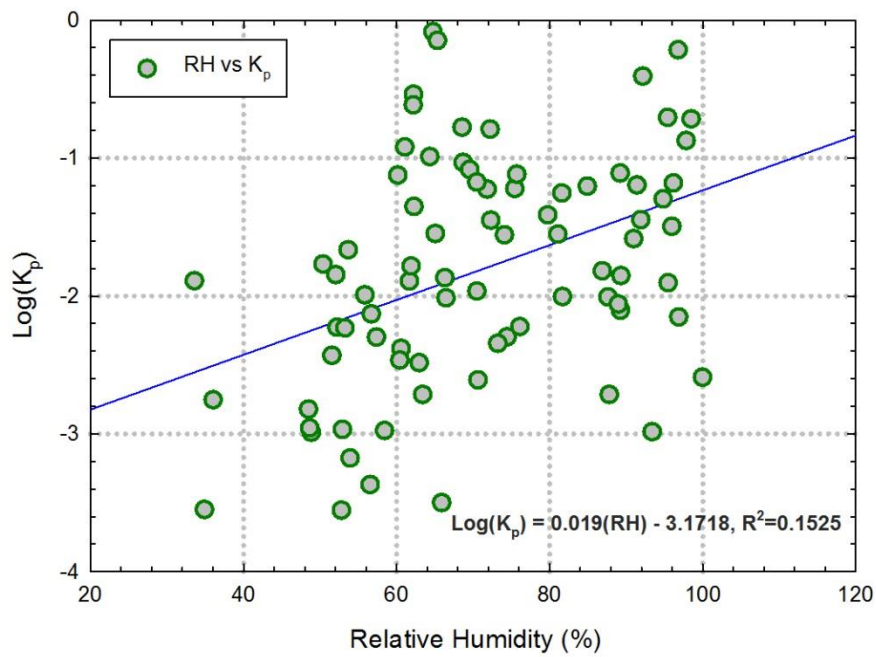

S1. The partial linear regression between  $K_p$  and temperature (upper panel) and between  $K_p$  and RH (lower panel).

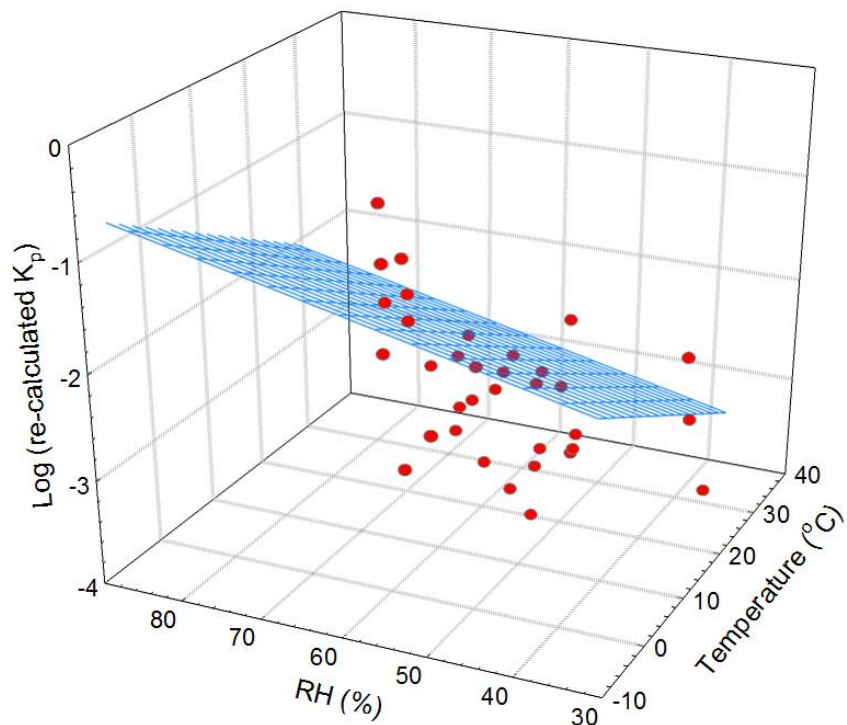

$$\log K_p = -2.35 - 0.060(T) + 0.013(\text{RH}), \quad R^2=0.47$$

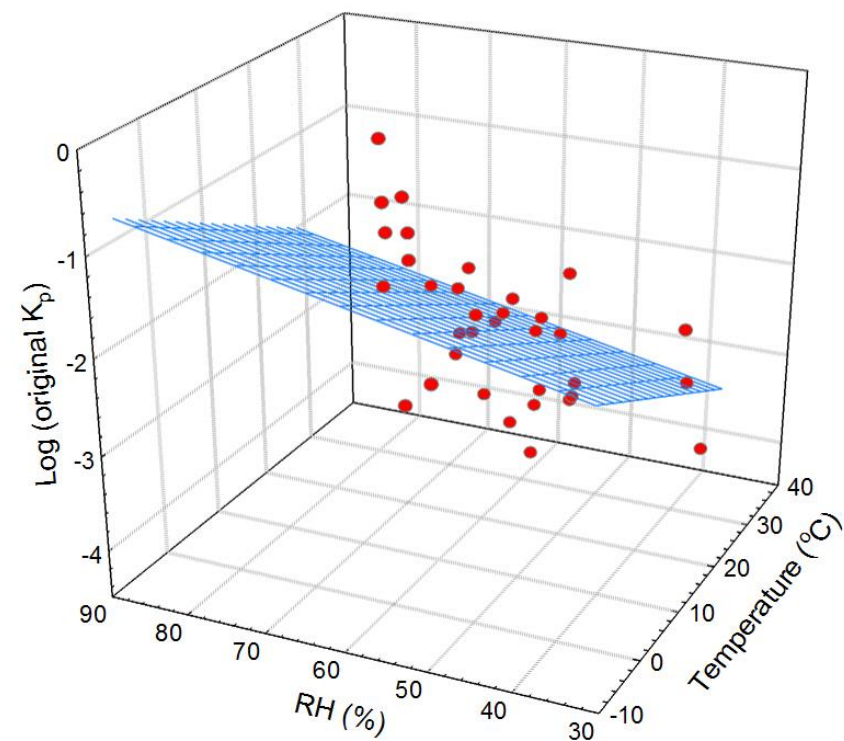

$$\log K_p = -2.78 - 0.061(T) + 0.028(\text{RH}), \quad R^2=0.52$$

S2. Comparison of  $K_p$  using re-calculated GOM concentration (left) with  $K_p$  using uncorrected GOM concentration (right). Data collected when RH was out of 20~65% were excluded

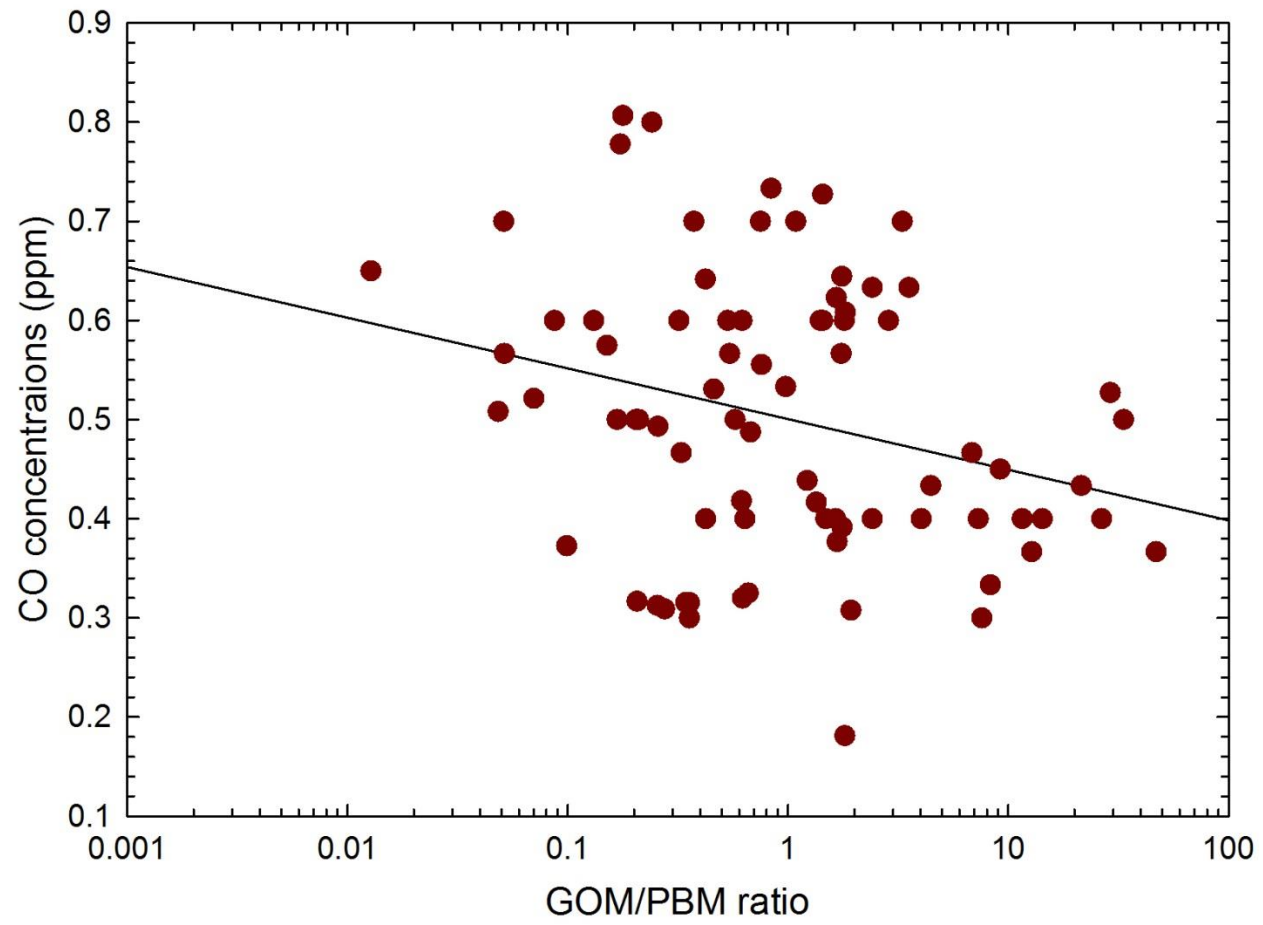

S3. The negative correlation between CO concentration and GOM/PBM ratio.

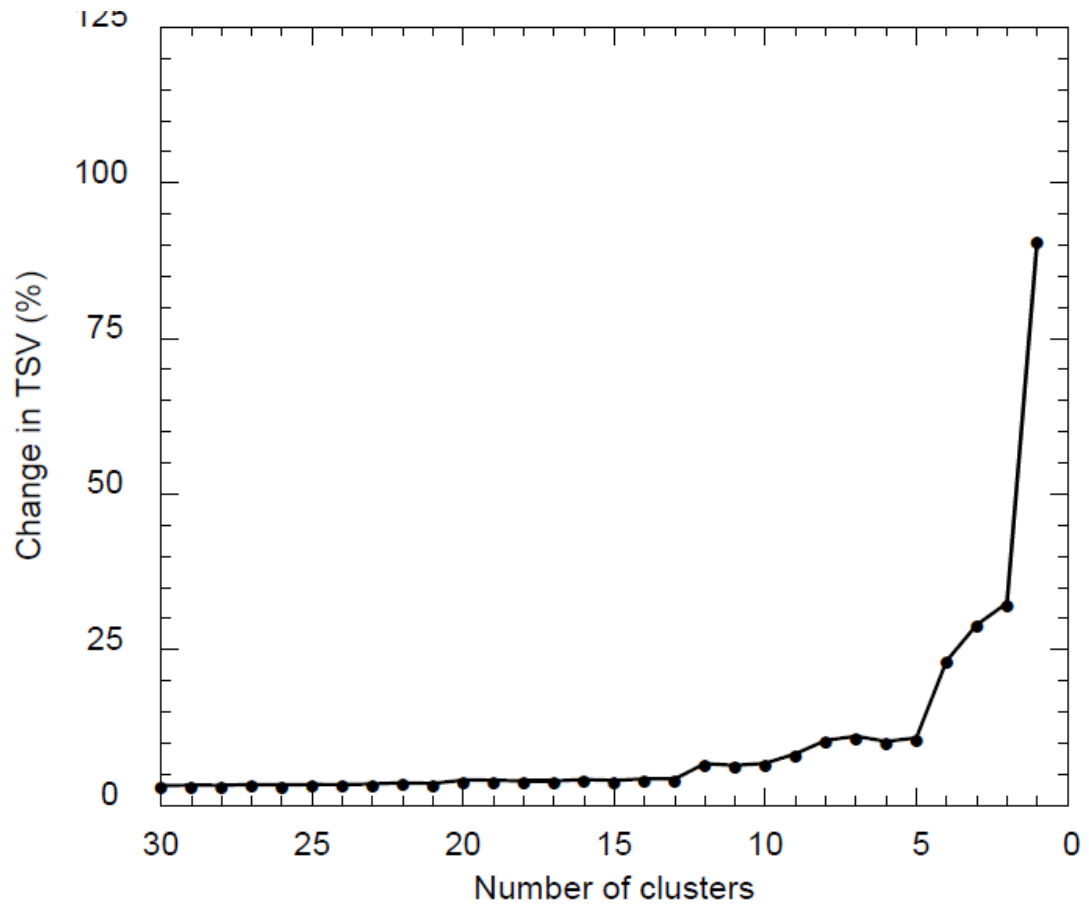

S4. Change in TSV as clusters are combined in this study.

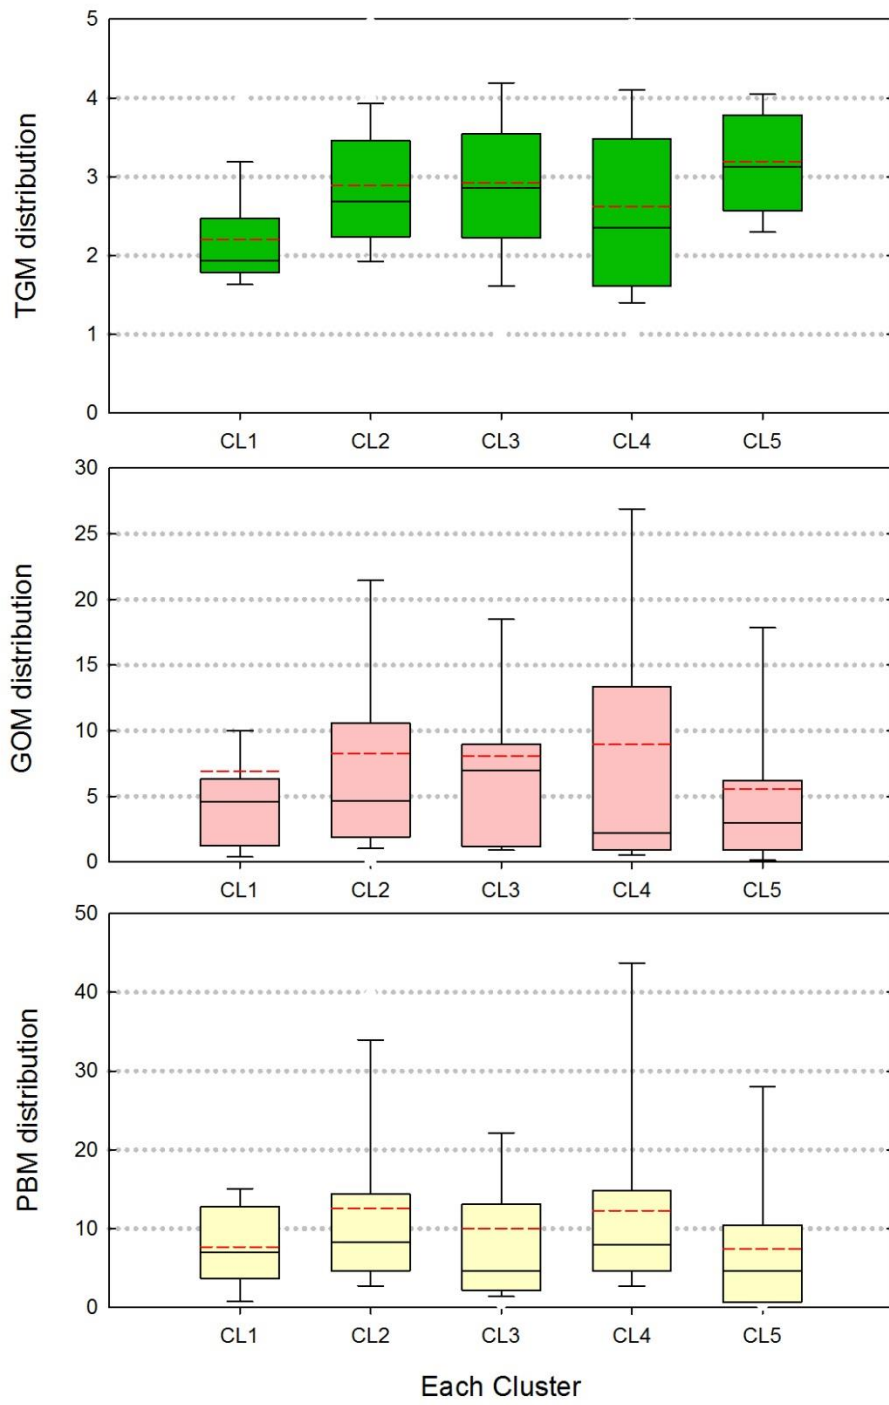

S5. Box-and-whisker plots for the concentrations of three Hg species for each cluster.
